# Supplementary material for: Effects of replacement therapies with clotting factors in patients with hemophilia: A systematic review and meta-analysis
Source: PubMed Central journal article supplement (PMC8759703; doi:10.1371/journal.pone.0262273), 2022-01-14
Supplement: pone.0262273.s001.pdf [file pone.0262273.s001.pdf]

1 **Supporting information**

2 **S1 Table. Search strategy.**

| Search engine | Date              | Term                                                                                                                                                                                                                                                                                                                                                                                                                           | Results |
|---------------|-------------------|--------------------------------------------------------------------------------------------------------------------------------------------------------------------------------------------------------------------------------------------------------------------------------------------------------------------------------------------------------------------------------------------------------------------------------|---------|
| PubMed        | December 10, 2020 | (haemophilia[TIAB] OR hemophilia[TIAB] OR "Hemophilia A"[Mesh] OR "Hemophilia B"[Mesh] OR "Factor XI Deficiency"[TIAB] OR "Factor VIII Deficiency"[TIAB]) AND (prophyla*[TIAB] OR episodic[TIAB] OR target[TIAB]) AND ((clinical[TIAB] AND trial[TIAB]) OR "clinical trials as topic"[MeSH] OR "clinical trial"[PT] OR random*[TIAB] OR "random allocation"[MeSH])                                                             | 502     |
| Scopus        | December 11, 2020 | (TITLE-ABS ("haemophilia") OR TITLE-ABS ("hemophilia") OR INDEXTERMS ("Hemophilia A") OR INDEXTERMS ("Hemophilia B") OR TITLE-ABS ("Factor XI Deficiency") OR TITLE-ABS ("Factor VIII Deficiency")) AND (TITLE-ABS("prophyla*") OR TITLE-ABS ("episodic") OR TITLE-ABS ("target")) AND ((TITLE-ABS ("clinical") AND TITLE-ABS ("trial")) OR INDEXTERMS ("clinical trials as topic") OR DOCTYPE ("clinical trial") OR TITLE-ABS | 521     |

|         |                   |                                                                                                                                                                                         |     |
|---------|-------------------|-----------------------------------------------------------------------------------------------------------------------------------------------------------------------------------------|-----|
|         |                   | ("random*") OR INDEXTERMS ("random allocation"))                                                                                                                                        |     |
| CENTRAL | December 12, 2020 | #1 (haemophilia):ti,ab,kw<br>#2 (hemophilia):ti,ab,kw<br>#3 #1 OR #2<br>#4 (prophyla*):ti,ab,kw<br>#5 (episodic):ti,ab,kw<br>#6 (target*):ti,ab,kw<br>#7 #4 OR #5 OR #6<br>#8 #3 AND #7 | 540 |

3

4
