# Supplementary material for: Effects of replacement therapies with clotting factors in patients with hemophilia: A systematic review and meta-analysis
Source: PubMed Central journal article supplement (PMC8759703; doi:10.1371/journal.pone.0262273), 2022-01-14
Supplement: pone.0262273.s002.pdf [file pone.0262273.s002.pdf]

# 1 Supporting information

## 2 S2 Table: Studies that were evaluated in full-text, and were excluded.

| N° | Title                                                                                                                                                                                                                                                                                                                           | Exclusion reason                                                                                                                |
|----|---------------------------------------------------------------------------------------------------------------------------------------------------------------------------------------------------------------------------------------------------------------------------------------------------------------------------------|---------------------------------------------------------------------------------------------------------------------------------|
| 1  | Antunes S, Tangada S, Stasyshyn O, Mamonov V, Phillips J, Guzman-Becerra N, et al. A prospective, open-label, randomized, parallel study with AICC to evaluate the efficacy and safety of prophylactic vs. on-demand treatment in hemophilia A or B subjects with inhibitors. Journal of thrombosis and haemostasis: JTH. 2013. | Were not studies published in scientific journals (conference abstracts, protocols, letter to the editor, or narrative reviews) |
| 2  | Antunes SV, Tangada S, Phillips J, Stasyshyn O, Mamonov V, Guzman-Becerra N, et al. Comparison of historic on-demand versus prospective on-demand and prophylaxis bleeding episodes in hemophilia A and B patients with inhibitors treated with FEIBA NF. Haemophilia. 2014.                                                    | Were not studies published in scientific journals (conference abstracts, protocols, letter to the editor, or narrative reviews) |
| 3  | Björkman S. Pharmacokinetics of plasma-derived and recombinant factor IX - implications for prophylaxis and on-demand therapy. Haemophilia. 2013.                                                                                                                                                                               | Not a randomized control trial.                                                                                                 |
| 4  | Carcao M, Feldman B, Pazmino-Canizares J, Hilliard P, Stain A, Blanchette V. Results of a randomized prospective clinical trial comparing standard to                                                                                                                                                                           | Were not studies published in scientific journals (conference abstracts, protocols, letter to the editor, or narrative reviews) |

|   |                                                                                                                                                                                                                                                                                     |                                                                                                                                 |
|---|-------------------------------------------------------------------------------------------------------------------------------------------------------------------------------------------------------------------------------------------------------------------------------------|---------------------------------------------------------------------------------------------------------------------------------|
|   | tailored prophylaxis in severe hemophilia A. Haemophilia. 2006.                                                                                                                                                                                                                     |                                                                                                                                 |
| 5 | Chakraborty J, Bhattacharyya M, Sankar Ray S. Effect of low dose prophylaxis versus episodic treatment on joint events in severe hemophilia a patients above 2 years: a randomized open label pilot study in Eastern India. Indian journal of hematology & blood transfusion. 2018. | Were not studies published in scientific journals (conference abstracts, protocols, letter to the editor, or narrative reviews) |
| 6 | Chozie N, Primacakti F, Tulaar A, Setiabudy R, Prasetyo M, Gatot D. Low-dose prophylaxis versus on-demand treatment in Indonesian children with severe hemophilia A: an interim report. Haemophilia. 2018.                                                                          | Were not studies published in scientific journals (conference abstracts, protocols, letter to the editor, or narrative reviews) |
| 7 | Chuansumrit A, Isarangkura P, Hathirat P. Prophylactic treatment for hemophilia A patients: a pilot study. The Southeast Asian journal of tropical medicine and public health. 1995.                                                                                                | Were not studies published in scientific journals (conference abstracts, protocols, letter to the editor, or narrative reviews) |
| 8 | Chuansumrit A, Sosothikul D, Natesirinilkul R, Lektrakul Y, Charoonruangrit U. Efficacy and safety of low-dose prophylaxis of highly purified plasma-derived factor VIII concentrate produced by the National Blood Centre, Thai Red Cross Society. Haemophilia. 2018.              | Not a randomized control trial.                                                                                                 |
| 9 | Collins P, Faradji A, Morfini M, Enriquez MM, Schwartz L. Efficacy and safety of secondary                                                                                                                                                                                          | Not a randomized control trial.                                                                                                 |

|    |                                                                                                                                                                                                                                                                  |                                                                                                                                 |
|----|------------------------------------------------------------------------------------------------------------------------------------------------------------------------------------------------------------------------------------------------------------------|---------------------------------------------------------------------------------------------------------------------------------|
|    | prophylactic vs. on-demand sucrose-formulated recombinant factor VIII treatment in adults with severe hemophilia A: results from a 13-month crossover study. Journal of thrombosis and haemostasis: JTH. 2010.                                                   |                                                                                                                                 |
| 10 | Ducore JM, Lalezari S, Santagostino E, Ahuja SP, Enriquez MM, Tueckmantel C, et al. Improvement in quality of life outcomes and bleeding rates among patients switching from on-demand FVIII to prophylactic bay 94-9027 in the protect VIII study. Blood. 2019. | Were not studies published in scientific journals (conference abstracts, protocols, letter to the editor, or narrative reviews) |
| 11 | Elalfy M, Elbarbary N. Bleeding patterns in severe hemophilia A infants and toddlers on prophylaxis vs. on-demand therapy: a prospective randomized observational study. Haemophilia. 2012.                                                                      | Were not studies published in scientific journals (conference abstracts, protocols, letter to the editor, or narrative reviews) |
| 12 | EU/EEA EO. Study to compare on-demand treatment with 2 prophylaxis regimens of BeneFIX in severe Hemophilia B subjects. 2015.                                                                                                                                    | Were not studies published in scientific journals (conference abstracts, protocols, letter to the editor, or narrative reviews) |
| 13 | Euctr BG. Trial to evaluate the effect of two treatment regimens for adults with severe hemophilia A. 2009.                                                                                                                                                      | Were not studies published in scientific journals (conference abstracts, protocols, letter to the editor, or narrative reviews) |
| 14 | Euctr CZ. A phase II/III, randomized, cross-over, open-label trial to demonstrate superiority of                                                                                                                                                                 | Were not studies published in scientific journals (conference                                                                   |

|    |                                                                                                                                                                                                                                                                                                                                                                                                                              |                                                                                                                                        |
|----|------------------------------------------------------------------------------------------------------------------------------------------------------------------------------------------------------------------------------------------------------------------------------------------------------------------------------------------------------------------------------------------------------------------------------|----------------------------------------------------------------------------------------------------------------------------------------|
|    | <p>prophylaxis over on-demand therapy in previously treated subjects with severe hemophilia A treated with plasma protein-free recombinant FVIII formulated with sucrose (BAY 81-8973). 2010.</p>                                                                                                                                                                                                                            | <p>abstracts, protocols, letter to the editor, or narrative reviews)</p>                                                               |
| 15 | <p>Euctr CZ. Randomized, comparative, open label treatment with double-blind placebo-controlled periods within treatment study to evaluate the efficacy and safety of a once-a-week prophylaxis treatment with BAY 79-4980 compared to once-a-week prophylaxis treatment and to on-demand treatment with rFVIII-FS reconstituted with water for injection in previously treated patients with severe hemophilia A. 2006.</p> | <p>Were not studies published in scientific journals (conference abstracts, protocols, letter to the editor, or narrative reviews)</p> |
| 16 | <p>Euctr DE. A Multicenter, Open-Label Study to Compare On-Demand Treatment With 2 Prophylaxis Regimens of Recombinant Coagulation Factor IX (BeneFIX) Reformulated Drug Product (rFIX-R) in Subjects with Severe Hemophilia B. - Prophylaxis Clinical Study. 2007.</p>                                                                                                                                                      | <p>Were not studies published in scientific journals (conference abstracts, protocols, letter to the editor, or narrative reviews)</p> |
| 17 | <p>Euctr ES. A Phase III Study to Evaluate the Efficacy, Safety, and Pharmacokinetics of Prophylactic RO5534262 versus No Prophylaxis in Hemophilia A Patients with Inhibitors. 2015.</p>                                                                                                                                                                                                                                    | <p>Were not studies published in scientific journals (conference abstracts, protocols, letter to the editor, or narrative reviews)</p> |
| 18 | <p>Euctr FR. A Double-Blind, Randomized, Crossover Study of the Recovery of FACTANE 100 versus 200</p>                                                                                                                                                                                                                                                                                                                       | <p>Were not studies published in scientific journals (conference</p>                                                                   |

|    |                                                                                                                                                                                                                                                                                         |                                                                                                                                 |
|----|-----------------------------------------------------------------------------------------------------------------------------------------------------------------------------------------------------------------------------------------------------------------------------------------|---------------------------------------------------------------------------------------------------------------------------------|
|    | IU/mL followed by an Open-Label Safety Study of FACTANE 200 IU/mL in Previously Treated Patients With Severe (FVIII: C<1%) Haemophilia A. 2009.                                                                                                                                         | abstracts, protocols, letter to the editor, or narrative reviews)                                                               |
| 19 | Euctr IT. A diagnostic interventional, controlled, cross-sectional evaluation of joint status using MRI in subjects with severe hemophilia A treated with primary prophylaxis, secondary prophylaxis, or on-demand therapy - ND. 2009.                                                  | Were not studies published in scientific journals (conference abstracts, protocols, letter to the editor, or narrative reviews) |
| 20 | Euctr IT. Advate Antihemophilic Factor (Recombinant), Plasma/Albumin-Free Method (Advate rAHF?PFM): a Phase 4 Study Comparing Two Prophylactic Regimens In Subjects With Severe Or Moderately Severe Hemophilia A. - ADVATE: a Phase IV Prophylactic Study. 2009.                       | Were not studies published in scientific journals (conference abstracts, protocols, letter to the editor, or narrative reviews) |
| 21 | Euctr IT. An Investigator-sponsored study on rFVIIa prophylaxis in children with haemophilia A and inhibitors - ENJOIH 01. 2009.                                                                                                                                                        | Were not studies published in scientific journals (conference abstracts, protocols, letter to the editor, or narrative reviews) |
| 22 | Euctr IT. Feiba nf: studio prospettico in aperto, randomizzato, a gruppi paralleli, volto a valutare efficacia e sicurezza del trattamento profilattico vs quello al bisogno in pazienti affetti da emofilia a o b e con inibitori a titolo elevato - FEIBA NF Prophylaxis Study. 2010. | Were not studies published in scientific journals (conference abstracts, protocols, letter to the editor, or narrative reviews) |

|    |                                                                                                                                                                                                                                                                                                     |                                                                                                                                 |
|----|-----------------------------------------------------------------------------------------------------------------------------------------------------------------------------------------------------------------------------------------------------------------------------------------------------|---------------------------------------------------------------------------------------------------------------------------------|
| 23 | Euctr IT. Phase I/II/III Pharmacokinetic and outcome study of Inspiration`s Recombinant Factor IX product, IB1001, in subjects with Hemophilia B - ND. 2009.                                                                                                                                        | Were not studies published in scientific journals (conference abstracts, protocols, letter to the editor, or narrative reviews) |
| 24 | Euctr NL. A Multi-centre, Single-blind Trial Evaluating Safety and Efficacy, including Pharmacokinetics, of NNC-0156-0000-0009 when used for Treatment and Prophylaxis of Bleeding Episodes in Patients with Haemophilia B - paradigm™2. 2011.                                                      | Were not studies published in scientific journals (conference abstracts, protocols, letter to the editor, or narrative reviews) |
| 25 | Euctr NL. Randomized, active-controlled, double-blind, parallel design study to evaluate the efficacy and safety of a once-a-week prophylaxis treatment with BAY 79-4980 compared to three times-per-week prophylaxis with rFVIII-FS in previously treated patients with severe hemophilia A. 2007. | Were not studies published in scientific journals (conference abstracts, protocols, letter to the editor, or narrative reviews) |
| 26 | Euctr PL. A study of the Safety and Effectiveness of Pegylated Recombinant Factor VIII (BAX 855) in Prevention of Bleeding in Patients with Severe Hemophilia A (a blood clotting disorder) using two different dosing schedules to target different levels of BAX855 in the blood. 2016.           | Were not studies published in scientific journals (conference abstracts, protocols, letter to the editor, or narrative reviews) |
| 27 | Gringeri A, Lundin B, Von Mackensen S, Mantovani L, Mannucci P. A randomized clinical trial on prophylaxis Vs. episodic treatment in children with                                                                                                                                                  | Were not studies published in scientific journals (conference                                                                   |

|    |                                                                                                                                                                                                                                                                                                                                                                                                                                   |                                                                                                                                 |
|----|-----------------------------------------------------------------------------------------------------------------------------------------------------------------------------------------------------------------------------------------------------------------------------------------------------------------------------------------------------------------------------------------------------------------------------------|---------------------------------------------------------------------------------------------------------------------------------|
|    | haemophilia A: the ESPRIT study. Haemophilia. 2010.                                                                                                                                                                                                                                                                                                                                                                               | abstracts, protocols, letter to the editor, or narrative reviews)                                                               |
| 28 | Gringeri A, Lundin B, von Mackensen S, Mantovani LG, Mannucci PM, Bianchi Bonomi A. Primary and secondary prophylaxis in children with haemophilia A reduces bleeding frequency and arthropathy development compared to on-demand treatment: a 10-year, randomized, clinical trial. Proceedings of the XXII congress of the international society on thrombosis and haemostasis (ISTH), boston, MA, USA, 11-16th july 2009. 2009. | Were not studies published in scientific journals (conference abstracts, protocols, letter to the editor, or narrative reviews) |
| 29 | Holme PA, Poulsen L, Simpson M, Liu T, Maas Enriquez M, Pabinger-Fasching I. Overall annualised bleeding rates <2 in patients with haemophilia A treated with every-5-day or every-7-day BAY 94-9027 prophylaxis for $\geq 100$ exposure days. Haemophilia. 2019.                                                                                                                                                                 | Were not studies published in scientific journals (conference abstracts, protocols, letter to the editor, or narrative reviews) |
| 30 | Jo H, Gringeri A, Leissing C, Mantovani L, Cortesi P, Gemmen E. Evaluating the cross-over effect on health-related quality of life in a randomized cross-over study of hemophilia-a patients. Value in health. 2011.                                                                                                                                                                                                              | Were not studies published in scientific journals (conference abstracts, protocols, letter to the editor, or narrative reviews) |
| 31 | Kavakli K, Smith L, Kuliczkowski K, Korth-Bradley J, You CW, Fuiman J, et al. Once-weekly prophylactic treatment vs. on-demand treatment with                                                                                                                                                                                                                                                                                     | Not a randomized control trial.                                                                                                 |

|    |                                                                                                                                                                                                                                                                                                 |                                                                                                                                 |
|----|-------------------------------------------------------------------------------------------------------------------------------------------------------------------------------------------------------------------------------------------------------------------------------------------------|---------------------------------------------------------------------------------------------------------------------------------|
|    | nonacog alfa in patients with moderately severe to severe haemophilia B. Haemophilia. 2016.                                                                                                                                                                                                     |                                                                                                                                 |
| 32 | Kavakli K, Yang R, Rusen L, Beckmann H, Tseneclidou-Stoeter D, Enriquez MM. Superiority of prophylaxis versus on-demand therapy with plasma protein-free recombinant FVIII formulated with sucrose (BAY 81-8973): LEOPOLD II study results. Haemophilia. 2014.                                  | Were not studies published in scientific journals (conference abstracts, protocols, letter to the editor, or narrative reviews) |
| 33 | Kempton C, Valluri S, Reding M, Lissitchkov T, Goranov S, Gercheva L, et al. Randomized, controlled, parallel-group trial of secondary prophylaxis vs on-demand treatment with sucrose-formulated recombinant factor VIII in adults with severe hemophilia A. Haemophilia. 2012.                | Were not studies published in scientific journals (conference abstracts, protocols, letter to the editor, or narrative reviews) |
| 34 | Kempton C, Valluri S, Reding M, Lissitchkov T, Goranov S, Gercheva L, et al. Regional differences in baseline patient-reported outcomes in a randomized, controlled, prospective trial of secondary prophylaxis VS on-demand treatment in patients with severe hemophilia A. Haemophilia. 2012. | Were not studies published in scientific journals (conference abstracts, protocols, letter to the editor, or narrative reviews) |
| 35 | Kerlin B, Kenet G, Saxena K, Caicedo J, Wang M, Afonja O. Baseline characteristics and bleeding outcomes in patients with severe hemophilia a administered bay 94-9027 prophylaxis every 5 or every 7 days. Pediatric blood & cancer. 2017.                                                     | Were not studies published in scientific journals (conference abstracts, protocols, letter to the editor, or narrative reviews) |



|    |                                                                                                                                                                                                                                                                                                                                                                                                                                                      |                                                                                                                                        |
|----|------------------------------------------------------------------------------------------------------------------------------------------------------------------------------------------------------------------------------------------------------------------------------------------------------------------------------------------------------------------------------------------------------------------------------------------------------|----------------------------------------------------------------------------------------------------------------------------------------|
| 36 | <p>Klamroth R, St Ledger K, Blackman N, Veldman A, Santagostino E, Oldenburg J, et al. Dosing of rVIII-singlechain based on clinical bleeding phenotypes: low bleeding rates and low consumption in patients treated with prophylaxis two or three times weekly. Haemophilia Conference: 10th annual congress of the european association for haemophilia and allied disorders France Conference start: 20170201 Conference end: 20170203. 2017.</p> | <p>Were not studies published in scientific journals (conference abstracts, protocols, letter to the editor, or narrative reviews)</p> |
| 37 | <p>Konkle B, Friedrich U, Abrams Z. Secondary prophylactic treatment with rFVIIa in patients with haemophilia A or B and inhibitors with high requirements for on-demand treatment. Haemophilia. 2006.</p>                                                                                                                                                                                                                                           | <p>Were not studies published in scientific journals (conference abstracts, protocols, letter to the editor, or narrative reviews)</p> |
| 38 | <p>Konkle BA, Stasyshyn O, Chowdary P, Bevan DH, Mant T, Shima M, et al. Pegylated, full-length, recombinant factor VIII for prophylactic and on-demand treatment of severe hemophilia A. Blood. 2015.</p>                                                                                                                                                                                                                                           | <p>Not a randomized control trial.</p>                                                                                                 |
| 39 | <p>Kulkarni R, Karim FA, Glamocanin S, Janic D, Vdovin V, Ozelo M, et al. Results from a large multinational clinical trial (guardian™3) using prophylactic treatment with turoctocog alfa in paediatric patients with severe haemophilia A: Safety, efficacy and pharmacokinetics. Haemophilia. 2013.</p>                                                                                                                                           | <p>Not a randomized control trial.</p>                                                                                                 |

|    |                                                                                                                                                                                                                                                                                                                                                       |                                                                                                                                 |
|----|-------------------------------------------------------------------------------------------------------------------------------------------------------------------------------------------------------------------------------------------------------------------------------------------------------------------------------------------------------|---------------------------------------------------------------------------------------------------------------------------------|
| 40 | Kulkarni R, Ragni MV, Baker RI, Pasi J, Manco-Johnson MJ, Potts J. Analysis of clinical target joint bleeding on prophylactic regimens with recombinant Factor VIII Fc fusion protein in patients with severe hemophilia A. Haemophilia. 2014.                                                                                                        | Were not studies published in scientific journals (conference abstracts, protocols, letter to the editor, or narrative reviews) |
| 41 | Lindvall K, Astermark J, Björkman S, Ljung R, Carlsson KS, Persson S, et al. Daily dosing prophylaxis for haemophilia: a randomized crossover pilot study evaluating feasibility and efficacy. Haemophilia. 2012                                                                                                                                      | Not a randomized control trial.                                                                                                 |
| 42 | Ljung R, Kenet G, Mancuso ME, Kaleva V, Rusen L, Tseneklidou-Stoeter D, Michaels LA, Shah A, Hong W, Maas Enriquez M; investigators of the LEOPOLD Kids Trial. BAY 81-8973 safety and efficacy for prophylaxis and treatment of bleeds in previously treated children with severe haemophilia A: results of the LEOPOLD Kids Trial. Haemophilia. 2016 | Not a randomized control trial.                                                                                                 |
| 43 | Mahlangu JN, Kavakli K, Hvitfeldt Poulsen L, Tseneklidou-Stoeter D, Beckmann H, Enriquez MM, et al. Prophylactic efficacy of twice-weekly vs. 3-timesweekly bay 81-8973 in severe hemophilia A: results of the Leopold I and II clinical trials. Journal of thrombosis and haemostasis: JTH. 2015.                                                    | Were not studies published in scientific journals (conference abstracts, protocols, letter to the editor, or narrative reviews) |
| 44 | Nct. A Trial to Compare Prophylaxis Therapy to On-demand Therapy With a New Full Length                                                                                                                                                                                                                                                               | Were not studies published in scientific journals (conference                                                                   |

|    |                                                                                                                                                              |                                                                                                                                 |
|----|--------------------------------------------------------------------------------------------------------------------------------------------------------------|---------------------------------------------------------------------------------------------------------------------------------|
|    | Recombinant FVIII in Patients With Severe Hemophilia A. 2010.                                                                                                | abstracts, protocols, letter to the editor, or narrative reviews)                                                               |
| 45 | Nct. Efficacy and Safety Study of Prophylactic Versus On-Demand Treatment With Feiba NF in Subjects With Hemophilia A or B and a High Titer Inhibitor. 2009. | Were not studies published in scientific journals (conference abstracts, protocols, letter to the editor, or narrative reviews) |
| 46 | Nct. Efficacy of NovoSeven® in Bleeding Prophylaxis in Hemophilia. 2005.                                                                                     | Were not studies published in scientific journals (conference abstracts, protocols, letter to the editor, or narrative reviews) |
| 47 | Nct. Efficacy Study of Activated Prothrombin Complex for Prevention of Bleeds in Hemophilia A With Inhibitors. 2005.                                         | Were not studies published in scientific journals (conference abstracts, protocols, letter to the editor, or narrative reviews) |
| 48 | Nct. Prophylaxis Study of Recombinant Factor VIII Manufactured Protein-Free (rAHF-PFM) in Patients With Hemophilia A. 2005.                                  | Were not studies published in scientific journals (conference abstracts, protocols, letter to the editor, or narrative reviews) |
| 49 | Nct. Safety and Efficacy of 3 Different Doses of Long Acting Factor VII in Haemophilia A or B Patients With Inhibitors. 2009.                                | Were not studies published in scientific journals (conference abstracts, protocols, letter to the editor, or narrative reviews) |
| 50 | Nct. Study Comparing On-Demand Treatment With Two Prophylaxis Regimens Of BeneFIX In Patients With Severe Hemophilia B. 2006.                                | Were not studies published in scientific journals (conference                                                                   |

|    |                                                                                                                                                                                                  |                                                                                                                                 |
|----|--------------------------------------------------------------------------------------------------------------------------------------------------------------------------------------------------|---------------------------------------------------------------------------------------------------------------------------------|
|    |                                                                                                                                                                                                  | abstracts, protocols, letter to the editor, or narrative reviews)                                                               |
| 51 | Nct. Study of the Efficacy of Human Recombinant Factor VIII (Kogenate FS) Reconstituted in Pegylated Liposomes. 2005.                                                                            | Were not studies published in scientific journals (conference abstracts, protocols, letter to the editor, or narrative reviews) |
| 52 | Nct. The Effect of Patient Counseling on Adolescent Hemophilia Patient Compliance With Bleeding Logs. 2005.                                                                                      | Were not studies published in scientific journals (conference abstracts, protocols, letter to the editor, or narrative reviews) |
| 53 | Nct. Trial to Evaluate the Effect of Secondary Prophylaxis With rFVIII Therapy in Severe Hemophilia A Adult and/or Adolescent Subjects Compared to That of Episodic Treatment. 2008.             | Were not studies published in scientific journals (conference abstracts, protocols, letter to the editor, or narrative reviews) |
| 54 | Nugent D, O'Mahony B, Dolan G. Value of prophylaxis vs on-demand treatment: application of a value framework in hemophilia. Haemophilia. 2018.                                                   | Not a randomized control trial.                                                                                                 |
| 55 | Oldenburg J, Holme P, Ducore J, Maas Enriquez M, Wang M. Annualised bleeding rates $\leq 2$ with every-5-day and every-7-day dosing of BAY 94-9027 in the protect VIII study. Haemophilia. 2019. | Were not studies published in scientific journals (conference abstracts, protocols, letter to the editor, or narrative reviews) |
| 56 | Pocoski J, Humphries TJ, Hong W. Spinart 3-year data: patient-reported benefits of adult prophylaxis vs on-demand treatment with bayer's sucrose-                                                | Were not studies published in scientific journals (conference abstracts, protocols, letter to the editor, or narrative reviews) |

|    |                                                                                                                                                                                                                                                                 |                                                                                                                                 |
|----|-----------------------------------------------------------------------------------------------------------------------------------------------------------------------------------------------------------------------------------------------------------------|---------------------------------------------------------------------------------------------------------------------------------|
|    | formulated recombinant factor viii. Haemophilia. 2015.                                                                                                                                                                                                          |                                                                                                                                 |
| 57 | Pollmann W, Huppertz-Helmhold S. Comparison of prophylaxis and on-demand treatment of hemophilia A patients treated with refacto. Annals of hematology. 2001.                                                                                                   | Were not studies published in scientific journals (conference abstracts, protocols, letter to the editor, or narrative reviews) |
| 58 | Powell JS, Perry D, Baker RI, Shapiro A, Manco-Johnson M, Potts J. Analysis of clinical target joint bleeding on prophylactic regimens with recombinant Factor IX Fc fusion protein in patients with severe hemophilia B. Haemophilia. 2014.                    | Were not studies published in scientific journals (conference abstracts, protocols, letter to the editor, or narrative reviews) |
| 59 | Ragni M, Kessler C, Fogarty P, Josephson N, Neff A, Raffini L. Phase III randomized, controlled trial of pre-emptive vs. standard prophylaxis to prevent inhibitor formation in children with severe hemophilia A: the inhibit study. Haemophilia. 2011.        | Were not studies published in scientific journals (conference abstracts, protocols, letter to the editor, or narrative reviews) |
| 60 | Ragni MV, Yabes JG, Fogarty PF, Josephson NC, Kessler CM, Neff AT, et al. Pilot randomized, non-inferiority, cross-over trial of once-weekly vs. three times-weekly recombinant factor VIII prophylaxis in adults with severe haemophilia A. Haemophilia. 2017. | Were not studies published in scientific journals (conference abstracts, protocols, letter to the editor, or narrative reviews) |
| 61 | Ragni MV. Rationale for a randomized controlled trial comparing two prophylaxis regimens in adults                                                                                                                                                              | Not a randomized control trial.                                                                                                 |

|    |                                                                                                                                                                                                                                                             |                                                                                                                                 |
|----|-------------------------------------------------------------------------------------------------------------------------------------------------------------------------------------------------------------------------------------------------------------|---------------------------------------------------------------------------------------------------------------------------------|
|    | with severe hemophilia A: the Hemophilia Adult Prophylaxis Trial. Expert Rev Hematol. 2011                                                                                                                                                                  |                                                                                                                                 |
| 62 | Rendo P, Smith L, Korth-Bradley J, Charnigo R, Shafer F. Evaluation of two secondary prophylaxis regimens of recombinant factor IX (r-fix) in moderately severe to severe (fix <2%) hemophilia B patients. Haemophilia. 2013.                               | Were not studies published in scientific journals (conference abstracts, protocols, letter to the editor, or narrative reviews) |
| 63 | Rendo P, Smith L, Lee HY, Shafer F. Nonacog alfa: An analysis of safety data from six prospective clinical studies in different patient populations with haemophilia B treated with different therapeutic modalities. Blood Coagulation Fibrinolysis. 2015. | Not a randomized control trial.                                                                                                 |
| 64 | Riva S, Gringeri A, Fusco F, Mantovani L. Direct costs of children with haemophilia A undergoing prophylaxis or episodic treatment: results from the ESPRIT study. Haemophilia. 2012.                                                                       | Were not studies published in scientific journals (conference abstracts, protocols, letter to the editor, or narrative reviews) |
| 65 | Santagostino E, Gringeri A, Muça-Perja M, Mannucci PM. A prospective clinical trial of implantable central venous access in children with haemophilia. Br J Haematol. 1998.                                                                                 | Not a randomized control trial.                                                                                                 |
| 66 | Shapiro AD, Neufeld EJ, Blanchette V, Salaj P, Gut RZ, Cooper DL. Safety of recombinant activated factor VII (rFVIIa) in patients with congenital haemophilia with inhibitors: Overall rFVIIa exposure and intervals following high (>240 µg kg-1)          | Not a randomized control trial.                                                                                                 |

|    |                                                                                                                                                                                                                                                                                                |                                                                                                                                 |
|----|------------------------------------------------------------------------------------------------------------------------------------------------------------------------------------------------------------------------------------------------------------------------------------------------|---------------------------------------------------------------------------------------------------------------------------------|
|    | rFVIIa doses across clinical trials and registries. Haemophilia. 2014.                                                                                                                                                                                                                         |                                                                                                                                 |
| 67 | Smith Mark P, Rupon J, Wali Y, Remawi H, Korth-Bradley J, Smith L, et al. Impact of Treatment Regimen with Moroctocog Alfa (AF-CC) on Bleeding Frequency in Pediatric Aged Subjects with Moderately Severe to Severe Hemophilia A. Blood. 2018.                                                | Were not studies published in scientific journals (conference abstracts, protocols, letter to the editor, or narrative reviews) |
| 68 | Song CK, Quon DV, Dolan G, Recht M, Guzman-Becerra N, Epstein JD, et al. Access to prophylaxis benefits hemophilia A subjects in both low and high IU/capita countries: adult subset analysis of a multicenter, open-label, randomized, phase 4 clinical study of rAHF-PFM. Haemophilia. 2012. | Were not studies published in scientific journals (conference abstracts, protocols, letter to the editor, or narrative reviews) |
| 69 | Songkla PN, Seksarn P, Sosothikul D. Comparison of different prophylactic regimens for Thai children with moderate and severe haemophilia A. Haemofilia. 2020.                                                                                                                                 | Not a randomized control trial.                                                                                                 |
| 70 | Tiede A, Oldenburg J, Lissitchkov T, Knaub S, Bichler J, Manco-Johnson MJ. Prophylaxis vs. on-demand treatment with Nuwiq(®) (Human-cl rhFVIII) in adults with severe haemophilia A. Haemophilia. 2016.                                                                                        | Not a randomized control trial.                                                                                                 |
| 71 | Urasinski T, Stasyshyn O, Andreeva T, Rusen L, Perina FG, Oh MS, et al. Recombinant factor IX                                                                                                                                                                                                  | Not a randomized control trial.                                                                                                 |

|    |                                                                                                                                                                                                                                                                                          |                                                                                                                                 |
|----|------------------------------------------------------------------------------------------------------------------------------------------------------------------------------------------------------------------------------------------------------------------------------------------|---------------------------------------------------------------------------------------------------------------------------------|
|    | (BAX3261) in previously treated paediatric patients with haemophilia B: A prospective clinical trial. Haemophilia. 2015.                                                                                                                                                                 |                                                                                                                                 |
| 72 | Valentino LA, Ewenstein BM, Guzman-Becerra N, Wong WY, Schoenig-Diesing C, Romanov V. Bleeding pattern and median time interval between bleeding episodes amongst patients receiving on-demand and prophylaxis therapy. Journal of thrombosis and haemostasis: JTH. 2013.                | Were not studies published in scientific journals (conference abstracts, protocols, letter to the editor, or narrative reviews) |
| 73 | Valentino LA, Plushch O, Rusen L, Andreeva T, Elezovic I, Charnigo R. A multicenter, open-label study to compare on-demand treatment with two prophylaxis regimens of recombinant coagulation factor IX in subjects with hemophilia B. Journal of thrombosis and haemostasis: JTH. 2011. | Were not studies published in scientific journals (conference abstracts, protocols, letter to the editor, or narrative reviews) |
| 74 | Verma S, Dutta T, Mahadevan S, Nalini P, Biswal N, Basu D, et al. Low-dose Factor VIII prophylaxis in children with severe hemophilia. Haemophilia. 2014.                                                                                                                                | Were not studies published in scientific journals (conference abstracts, protocols, letter to the editor, or narrative reviews) |
| 75 | Von MacKensen S, Riva S, Fusco F, Mantovani L, Gringeri A. Quality of life of children with hemophilia A undergoing prophylaxis or episodic treatment: results from the ESPRIT study. Journal of thrombosis and haemostasis: JTH. 2011.                                                  | Were not studies published in scientific journals (conference abstracts, protocols, letter to the editor, or narrative reviews) |



|    |                                                                                                                                                                                                                                                                                              |                                                                                                                                 |
|----|----------------------------------------------------------------------------------------------------------------------------------------------------------------------------------------------------------------------------------------------------------------------------------------------|---------------------------------------------------------------------------------------------------------------------------------|
| 76 | Wu R, Sun J, Xiao J, Liu Y, Xue F, Wang H, et al. A prospective study of health-related quality of life of boys with severe haemophilia A in China: comparing on-demand to prophylaxis treatment. <i>Haemophilia</i> . 2017.                                                                 | Not a randomized control trial.                                                                                                 |
| 77 | Zarkova AG, Kempton CL, Reding MT, Lissitchkov T, Goranov S, Gercheva L. Bleeding frequency subanalyses in a randomized controlled trial of prophylaxis vs on-demand treatment with sucrose-formulated recombinant factor VII in adults with severe hemophilia A. <i>Haemophilia</i> . 2013. | Were not studies published in scientific journals (conference abstracts, protocols, letter to the editor, or narrative reviews) |
| 78 | Zhao Y, Xiao J, Yang R, Wu R, Hu Y, Beckmann H, et al. Efficacy of standard prophylaxis versus on-demand treatment with bayer's sucrose-formulated recombinant FVIII (rFVIII-FS) in Chinese children with severe hemophilia A. <i>Pediatric hematology and oncology</i> . 2017.              | Not a randomized control trial.                                                                                                 |
| 79 | Corrigendum to Randomized, controlled, parallel-group trial of routine prophylaxis vs. on-demand treatment with sucrose-formulated recombinant factor VIII in adults with severe hemophilia A (SPINART). <i>Journal of thrombosis and haemostasis : JTH</i> . 2014.                          | Not a randomized control trial.                                                                                                 |
| 80 | Santagostino E, Mancuso ME, Rocino A, Mancuso G, Scaraggi F, Mannucci PM. A prospective randomized                                                                                                                                                                                           | Did not assess the interventions of interest                                                                                    |

|    |                                                                                                                                                                                                                                                                                                          |                                              |
|----|----------------------------------------------------------------------------------------------------------------------------------------------------------------------------------------------------------------------------------------------------------------------------------------------------------|----------------------------------------------|
|    | trial of high and standard dosages of recombinant factor VIIa for treatment of hemarthroses in hemophiliacs with inhibitors. J Thromb Haemost. 2006.                                                                                                                                                     |                                              |
| 81 | Antunes SV, Tangada S, Stasyshyn O, Mamonov V, Phillips J, Guzman-Becerra N, et al. Randomized comparison of prophylaxis and on-demand regimens with FEIBA NF in the treatment of haemophilia A and B with inhibitors. HAEMOPHILIA. 2014.                                                                | Did not assess the interventions of interest |
| 82 | Ljung, R., Karim, F. A., Saxena, K., Suzuki, T., Arkhammar, P., ... Rosholm, A. 40K glycoPEGylated, recombinant FVIIa: 3-month, double-blind, randomized trial of safety, pharmacokinetics and preliminary efficacy in hemophilia patients with inhibitors. Journal of Thrombosis and Haemostasis. 2013. | Did not assess the interventions of interest |

3

4
