# Supplementary material for: Effects of replacement therapies with clotting factors in patients with hemophilia: A systematic review and meta-analysis
Source: PubMed Central journal article supplement (PMC8759703; doi:10.1371/journal.pone.0262273), 2022-01-14
Supplement: pone.0262273.s003.pdf [file pone.0262273.s003.pdf]

# 1 Supporting information

## 2 S3 Table. Additional results found in the studies.

| Outcomes<br>(follow-up)                                                                                          | № of<br>participants<br>(studies) | Anticipated absolute<br>effects* (95% CI)                                                                                                                           |                           | Relative effect<br>(95% CI) | Certainty<br>of the<br>evidence<br>(GRADE) |
|------------------------------------------------------------------------------------------------------------------|-----------------------------------|---------------------------------------------------------------------------------------------------------------------------------------------------------------------|---------------------------|-----------------------------|--------------------------------------------|
|                                                                                                                  |                                   | Risk with<br>Control                                                                                                                                                | Risk with<br>Intervention |                             |                                            |
| <i>Episodic treatment vs Low-dose prophylaxis</i>                                                                |                                   |                                                                                                                                                                     |                           |                             |                                            |
| Change in the<br>Haemophilia<br>Early<br>Arthropathy<br>Detection with<br>Ultrasound<br>(HEAD-US)<br>(12 months) | 50 (1 RCT)                        | <ul style="list-style-type: none"> <li>• <b>Chozie 2019:</b> Low-dose prophylaxis: mean of 1.84. Episodic treatment: mean of 0.2 (p= 0.257).</li> </ul>             |                           |                             | ⊕○○○<br>VERY<br>LOW <sup>a,b,c</sup>       |
| <i>Episodic treatment vs Intermediate-dose prophylaxis</i>                                                       |                                   |                                                                                                                                                                     |                           |                             |                                            |
| Change in the<br>Colorado<br>Adult Joint<br>Assessment<br>Scale<br>(CAJAS),<br>which assess<br>joint physical    | 83 (1 RCT)                        | <ul style="list-style-type: none"> <li>• <b>Manco-Johnson 2017:</b> Intermediate-dose prophylaxis: mean -0.31. Episodic treatment: mean 0.63 (p= 0.007).</li> </ul> |                           |                             | ⊕○○○<br>VERY<br>LOW <sup>a,b,c</sup>       |

|                                                                                                  |            |                                                                                                                                                                                                                                                                                                                                                                                                                                                            |                                      |
|--------------------------------------------------------------------------------------------------|------------|------------------------------------------------------------------------------------------------------------------------------------------------------------------------------------------------------------------------------------------------------------------------------------------------------------------------------------------------------------------------------------------------------------------------------------------------------------|--------------------------------------|
| examination<br>(lower =<br>better) (36<br>months)                                                |            |                                                                                                                                                                                                                                                                                                                                                                                                                                                            |                                      |
| Pain score<br>(Short-form<br>McGill Pain<br>Questionnaire)<br>(lower =<br>better) (36<br>months) | 83 (1 RCT) | <ul style="list-style-type: none"> <li>• <b>Manco-Johnson 2017:</b> Intermediate-dose prophylaxis: mean -2.5. Episodic treatment: mean 2.4. No p-value provided.</li> </ul>                                                                                                                                                                                                                                                                                | ⊕○○○<br>VERY<br>LOW <sup>a,b,c</sup> |
| Change in<br>activity level<br>(36 months)                                                       | 83 (1 RCT) | <ul style="list-style-type: none"> <li>• <b>Manco-Johnson 2017</b> reported that the proportions at baseline and at 3 years were: <ul style="list-style-type: none"> <li>○ Increased activity: Intermediate-dose prophylaxis 7.1% to 40.5%. Episodic treatment: 14.3% to 19.0%.</li> <li>○ Unrestricted work/school and recreational activities: Intermediate-dose prophylaxis: 33.3% to 47.6%. Episodic treatment: 38.1% to 26.2%.</li> </ul> </li> </ul> | ⊕○○○<br>VERY<br>LOW <sup>a,b,c</sup> |
| Healthcare<br>Resource<br>Utilization<br>(HRU) (36<br>months)                                    | 83 (1 RCT) | <ul style="list-style-type: none"> <li>• <b>Manco-Johnson 2017:</b> HRU in patients with episodic treatment was higher than in those with intermediate-dose prophylaxis: hematologists (2.43-fold), primary care physicians (3.17-fold), and nurses (2.2-</li> </ul>                                                                                                                                                                                       | ⊕○○○<br>VERY<br>LOW <sup>a,b,c</sup> |

|                                                                        |             |                                                                                                                                                                                                                                                                                                                                                                                                                                                                                                                   |                                      |
|------------------------------------------------------------------------|-------------|-------------------------------------------------------------------------------------------------------------------------------------------------------------------------------------------------------------------------------------------------------------------------------------------------------------------------------------------------------------------------------------------------------------------------------------------------------------------------------------------------------------------|--------------------------------------|
|                                                                        |             | fold); laboratory utilization (1.79-fold); and joint surgeries (performed in 23.8% vs 9.5% of patients).                                                                                                                                                                                                                                                                                                                                                                                                          |                                      |
| Treatment satisfaction (36 months)                                     | 83 (1 RCT)  | <ul style="list-style-type: none"> <li>• <b>Manco-Johnson 2017</b> reported that the treatment satisfaction at 3 years in patients with intermediate-dose prophylaxis and episodic treatment were: <ul style="list-style-type: none"> <li>○ Treatment somewhat/greatly exceeded their expectations: 42.9% and 26.2%.</li> <li>○ Very/extremely satisfied with treatment: 64.3% and 42.9%.</li> <li>○ Probably/definitely would continue with their replacement therapies: 66.7% and 47.6%.</li> </ul> </li> </ul> | ⊕○○○<br>VERY<br>LOW <sup>a,b,c</sup> |
| <b><i>Studies that compared two different prophylactic factors</i></b> |             |                                                                                                                                                                                                                                                                                                                                                                                                                                                                                                                   |                                      |
| Annualized bleeding rate (ABR) (11.5 months)                           | 131 (1 RCT) | <ul style="list-style-type: none"> <li>• <b>Powell 2012:</b> ABR was higher (worse) in patients with BAY 79-4980 (mean 15.0 SD 14.2) than in those with rFVIII-FS (mean 5.8 SD 6.9). No p-value provided.</li> </ul>                                                                                                                                                                                                                                                                                              | ⊕○○○<br>VERY<br>LOW <sup>a,b,c</sup> |
| Annualized joint bleeding rate (AJBR) (11.5 months)                    | 131 (1 RCT) | <ul style="list-style-type: none"> <li>• <b>Powell 2012:</b> AJBR was higher (worse) in patients with BAY 79-4980 (mean 12.2 SD 14.2) than in those with rFVIII-FS (mean 5.0 SD 6.3). No p-value provided.</li> </ul>                                                                                                                                                                                                                                                                                             | ⊕○○○<br>VERY<br>LOW <sup>a,b,c</sup> |

|                                                                                                                                                         |             |                                                                                                                                                                                                                                                                                                                  |                                      |
|---------------------------------------------------------------------------------------------------------------------------------------------------------|-------------|------------------------------------------------------------------------------------------------------------------------------------------------------------------------------------------------------------------------------------------------------------------------------------------------------------------|--------------------------------------|
| Adverse events (11.5 months)                                                                                                                            | 131 (1 RCT) | <ul style="list-style-type: none"> <li>• <b>Powell 2012:</b> No patient developed inhibitors in both groups.</li> </ul>                                                                                                                                                                                          | ⊕○○○<br>VERY<br>LOW <sup>a,b,c</sup> |
| <b><i>Studies that assessed intermediate-dose prophylaxis vs pharmacokinetic prophylaxis</i></b>                                                        |             |                                                                                                                                                                                                                                                                                                                  |                                      |
| Annualized bleeding rate (ABR) (12 months)                                                                                                              | 66 (1 RCT)  | <ul style="list-style-type: none"> <li>• <b>Valentino 2012:</b> Mean ABR in patients with PK-prophylaxis: 1.9. Intermediate-dose prophylaxis: 1.6, p= 0.2588.</li> </ul>                                                                                                                                         | ⊕○○○<br>VERY<br>LOW <sup>a,b,c</sup> |
| Quality of life (12 months)                                                                                                                             | 66 (1 RCT)  | <ul style="list-style-type: none"> <li>• <b>Valentino 2012:</b> median score of HRQoL at 1 year in patients in both groups treatment “did not show statistical differences” (no data provided).</li> </ul>                                                                                                       | ⊕○○○<br>VERY<br>LOW <sup>a,b,c</sup> |
| Adverse events (12 months)                                                                                                                              | 66 (1 RCT)  | <ul style="list-style-type: none"> <li>• <b>Valentino 2012</b> reported that no patient developed inhibitors in both groups, and that the adverse events was similar in patients with PK-prophylaxis (mean rate 0.089) and in those with intermediate-dose prophylaxis (mean rate 0.356), p&gt; 0.05.</li> </ul> | ⊕○○○<br>VERY<br>LOW <sup>a,b,c</sup> |
| <b><i>Studies in which the groups received the same weekly doses but with different frequency (50 IU/kg twice a week, vs 100 IU/kg once a week)</i></b> |             |                                                                                                                                                                                                                                                                                                                  |                                      |
| Annualized bleeding rate (ABR) (8 months)                                                                                                               | 44 (1 RCT)  | <ul style="list-style-type: none"> <li>• <b>Valentino 2014:</b> Mean ABR was similar in patients that used 50 IU/kg twice a week: 2.6. In patients that used 100 IU/kg once a week: 4.6, p = 0.217.</li> </ul>                                                                                                   | ⊕○○○<br>VERY<br>LOW <sup>a,b,c</sup> |

|                                           |            |                                                                                                                                                                                                              |                                          |
|-------------------------------------------|------------|--------------------------------------------------------------------------------------------------------------------------------------------------------------------------------------------------------------|------------------------------------------|
| Annualized joint bleeding rate (8 months) | 44 (1 RCT) | <ul style="list-style-type: none"> <li>• <b>Valentino 2014</b> Mean AJBR in patients that used 50 IU/kg twice a week: 1.9. In patients that used 100 IU/kg once a week: 3.6. No p-value provided.</li> </ul> | ⊕○○○<br><b>VERY LOW</b> <sup>a,b,c</sup> |
|-------------------------------------------|------------|--------------------------------------------------------------------------------------------------------------------------------------------------------------------------------------------------------------|------------------------------------------|

\*The risk in the intervention group (and its 95% confidence interval) is based on the assumed risk in the comparison group and the relative effect of the intervention (and its 95% CI).

**CI:** Confidence interval; **eMRI:** Extended magnetic resonance imaging; **MD:** mean difference; **IQR:** Interquartile range; **SD:** Standard deviation; **HRQoL:** Health-related quality of life.

**Explanations**

- a. We rated down one level for risk of bias.
- b. We rated down two levels for imprecision due to the small number of participants that presented the outcome (less than 200).
- c. We rated down one level for publication bias.
